# Supplementary material for: Effects of Live Music Therapy versus Storytelling on Physiological and Behavioral Parameters in Preterm Infants: A Randomized Controlled Trial
Source: Research Square preprint supplement (doi:10.21203/rs.3.rs-7246882/v1), 2025-08-19
Supplement: Supplementary file 1 [file 7400548215af28451eabc55c.docx]

Table S1. COMFORTneo subscores before, during, and after music therapy sessions and storytelling sessions.

| **Subscore** | **Therapy** | **Sessions**  **(n)** | **Mean before therapy**  **(95% CI)** | **Mean during therapy**  **(95% CI)** | **Mean after therapy**  **(95% CI)** |
| --- | --- | --- | --- | --- | --- |
| Alertness | Music therapy | 303 | 2.5 (2.4–2.6) | 1.7 (1.6–1.8) | 1.3 (1.2–1.4) |
| Storytelling | 249 | 2.6 (2.4–2.7) | 2.1 (2.0–2.2) | 1.9 (1.8–2.1) |
| Calmness | Music therapy | 303 | 2.2 (2.1–2.3) | 1.5 (1.4–1.5) | 1.2 (1.2–1.3) |
| Storytelling | 249 | 2.3 (2.0–2.4) | 1.9 (1.8–2.0) | 1.8 (1.7–1.9) |
| Crying | Music therapy | 303 | 1.4 (1.3–1.4) | 1.1 (1.0–1.1) | 1.0 (1.0–1.1) |
| Storytelling | 249 | 1.5 (1.4–1.6) | 1. (1.1–1.2) | 1.1 (1.1–1.2) |
| Body Movement | Music therapy | 303 | 2.2 (2.1–2.3) | 1.5 (1.4–1.6) | 1.2 (1.1–1.2) |
| Storytelling | 249 | 2.1 (2.0–2.2) | 1.9 (1.8–2.0) | 1.9 (1.8–2.0) |
| Facial tension | Music therapy | 303 | 2.3 (2.2–2.4) | 1.6 (1.5–1.6) | 1.3 (1.3–1.4) |
| Storytelling | 249 | 2.2 (2.2–2.3) | 1.9 (1.8–2.0) | 2.0 (1.9–2.1) |
| Muscle Tone | Music therapy | 303 | 2.2 (2.1–2.3) | 1.4 (1.3–1.5) | 1.2 (1.2–1.3) |
| Storytelling | 249 | 2.2 (2.1–2.3) | 1.8 (1.7–1.9) | 1.9 (1.8–2.0) |

CI = confidence interval.
